# Supplementary material for: Facile spectroscopic approach to obtain the optoelectronic properties of few-layered graphene oxide thin films and their role in photocatalysis
Source: Royal Society of Chemistry journal article supplement (doi:10.1039/c7nj03614k), 2017-01-01
Supplement: c7nj03614k1.pdf [file c7nj03614k1.pdf]

## Supplementary Information

# **Facile spectroscopic approach for optoelectronic properties of few-layered graphene oxide thin films and its role in photocatalysis as composite with RF sputtered ZnO**

**Asim Jilani<sup>1,2</sup>, Mohd Hafiz Dzarfan Othman<sup>1,3\*</sup>, Mohammad Omaish Ansari<sup>2,4\*\*</sup>, Rajeev Kumar<sup>5</sup>, Ahmed Alshahrie<sup>2</sup>, Ahmad Fauzi Ismail<sup>1,4</sup>, Imran Ullah Khan<sup>1,6</sup> Sajith VK<sup>2</sup>, M.A Barakat<sup>5</sup>**

*<sup>1</sup>Advanced Membrane Technology Research Centre, Universiti Teknologi Malaysia, 81310 UTM Johor Bahru, Johor, Malaysia*

*<sup>2</sup>Center of Nanotechnology, King Abdul-Aziz University, 21589 Jeddah, Saudi Arabia*

*<sup>3</sup>Faculty of Chemical and Energy Engineering, Universiti Teknologi Malaysia, 81310 UTM Johor Bahru, Johor, Malaysia*

*<sup>4</sup> School of Chemical Engineering, Yeungnam University, Gyeongsan-si, Gyeongbuk 712-749, South Korea*

*<sup>5</sup>Department of Environmental Sciences, Faculty of Meteorology, Environment and Arid Land Agriculture, King Abdul-Aziz University, Jeddah 21589, Saudi Arabia*

*<sup>6</sup>School of Chemical and Material Engineering, National University of Science and Technology (NUST), Sector H-12 (44000) Islamabad, Pakistan*

## **S.1 Analysis of ZnO over rGO**

### **S.1.1 X-ray diffraction**

The XRD analysis was carried out for the confirmation of deposited ZnO over the rGO. The Fig. S1 shows the observed diffraction pattern of ZnO/rGO. The XRD pattern clearly reveals deposition of ZnO over the rGO. The peak at  $2\theta$  of rGO (pure rGO) shifted from 23.52 to 24.67 after the deposition of ZnO over the rGO thin film. The shifting of diffraction peak also suggests the interpolation and adsorption of zinc ion into the rGO sites. The ZnO peaks are well matched with the JPCD card # 01-070-8072.

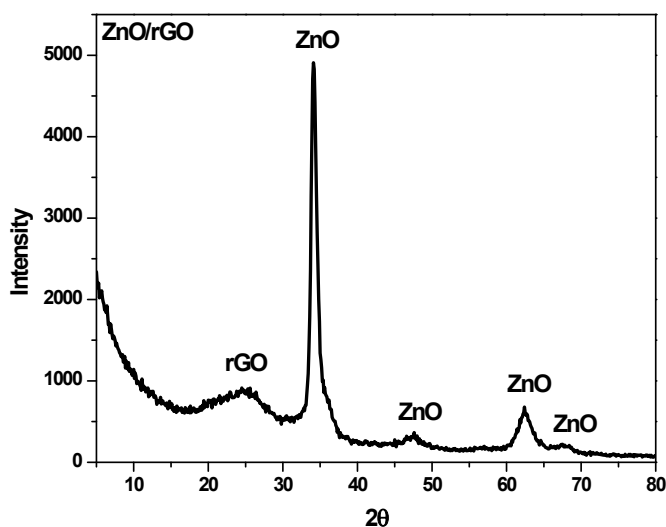

**Figure S1:** XRD pattern of rGO/ZnO thin film

## 1.2 Field emission scanning electron microscope

The field emission scanning electron was also used for cross verification of ZnO thin films deposition over rGO. **Fig. S2** shows the uniform deposition of ZnO over the rGO with the average particle size about 10 nm. rGO sheets can easily be seen under the ZnO deposition.

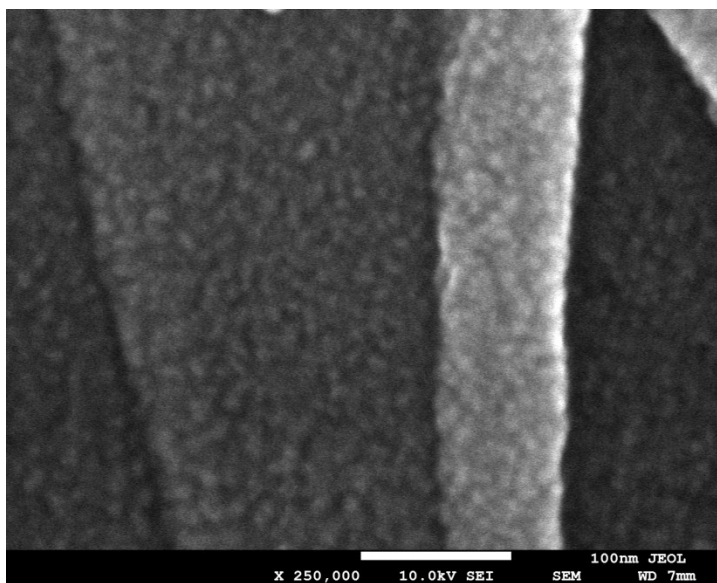

**Figure S2:** FESEM micrograph of rGO/ZnO thin film
